# Supplementary material for: Developing an in vitro model of haematoma for study of intracerebral haemorrhage
Source: Royal Society of Chemistry journal article supplement (doi:10.1039/d4bm00039k), 2024-01-01
Supplement: d4bm00039k3.pdf [file d4bm00039k3.pdf]

## Supplementary information

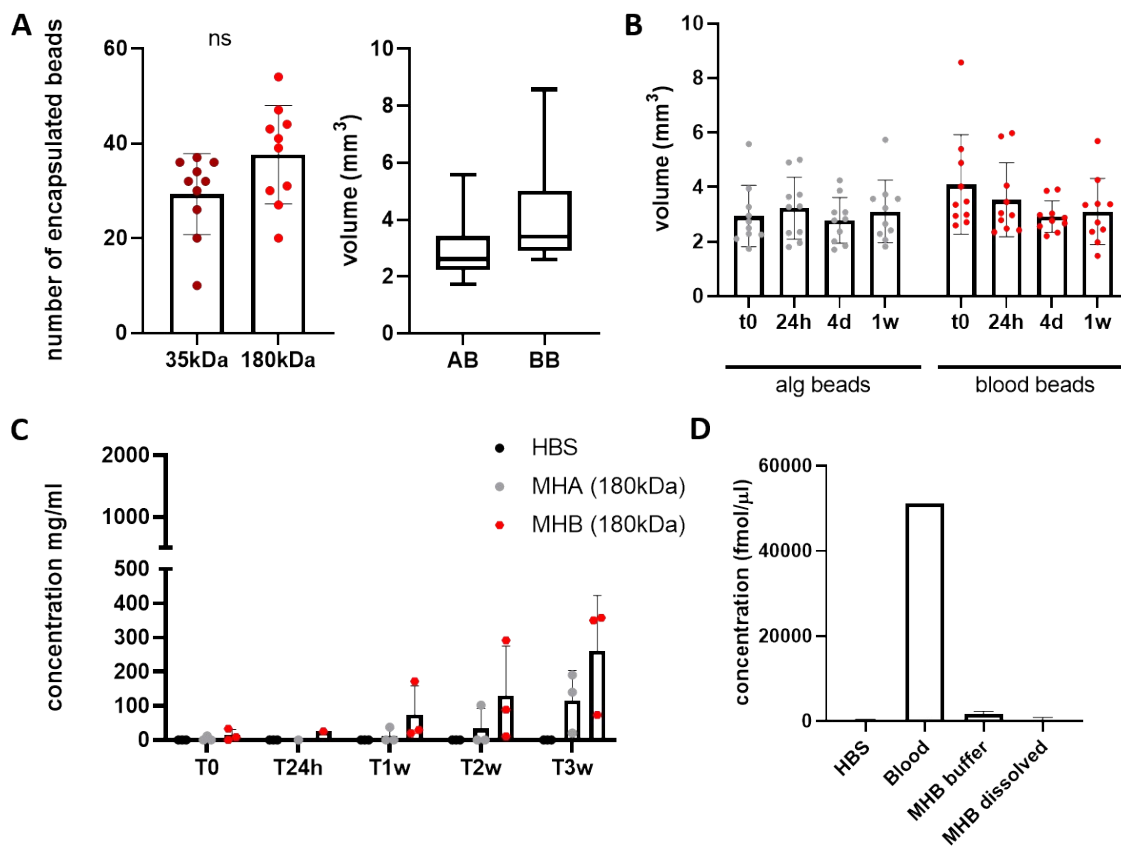

Supplementary Figure 1: (A) Number of beads encapsulated in A4-HA<sub>35</sub>/CS and A4-HA<sub>180</sub>/CS hydrogel MH and average volumes (A4-HA<sub>180</sub>/CS) with AB and BB (B) Average volumes of the A4-HA<sub>180</sub>/CS MH over time. (C) Protein release into buffer over 3 weeks storage at 4 degrees n=3 s.d (D) Hemin concentrations in buffer and dissolved gels after 3 weeks (n=2).
