# Supplementary figures and images for: Developing an in vitro model of haematoma for study of intracerebral haemorrhage
Source: Royal Society of Chemistry journal article supplement (doi:10.1039/d4bm00039k), 2024-01-01

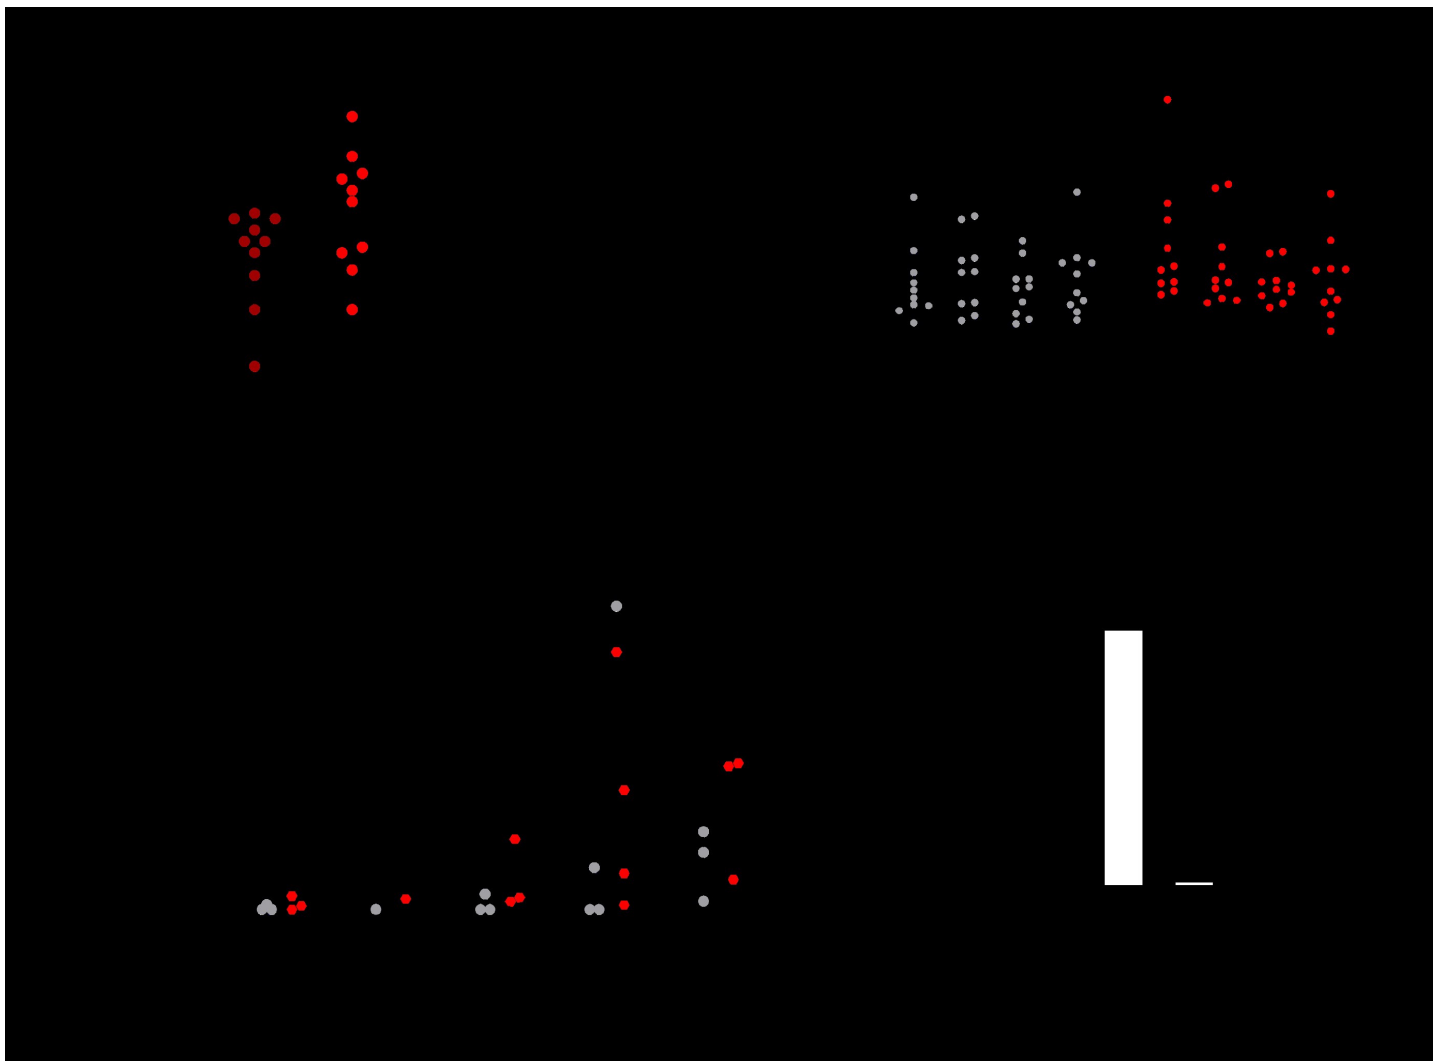

Supplement: d4bm00039k2.pdf [file d4bm00039k2.pdf]

Unprocessed Western Blot images

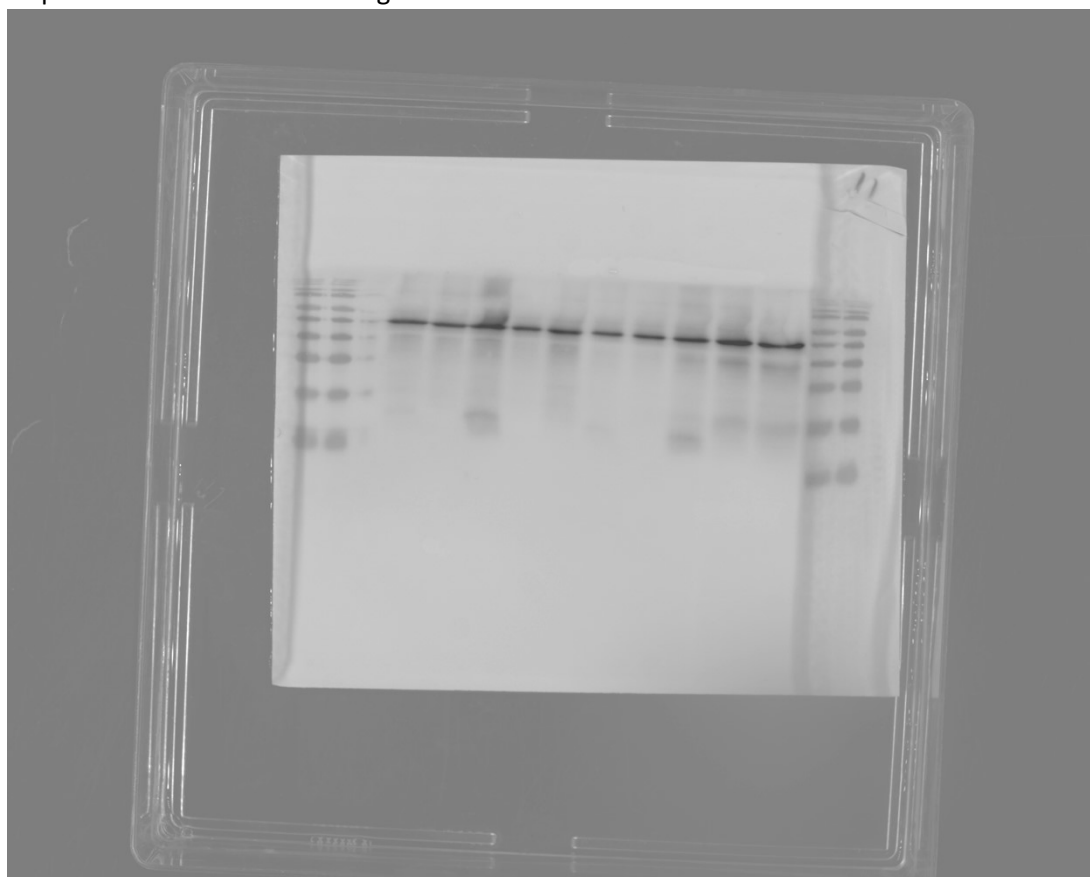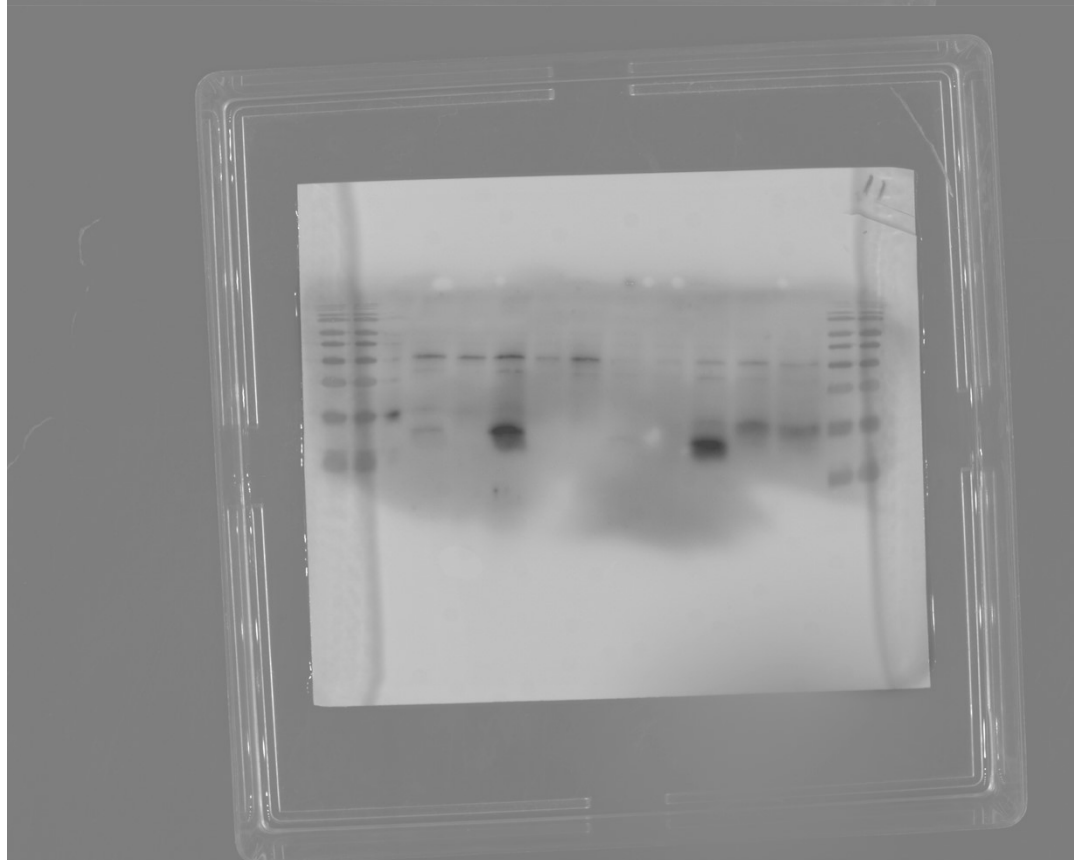

Supplement: d4bm00039k4.pdf [file d4bm00039k4.pdf]
